# Supplementary material for: Examining the Effect of Ionizing Radiations in Ion-Exchange Membranes of Interest in Biomedical Applications
Source: MDPI journal article supplement (doi:10.3390/membranes13060592), 2023-06-10
Supplement: s1 [file s1]

Supplementary Material for

**Examining the effect of ionizing radiations in ion-exchange membranes of interest  
in biomedical applications.**

Íñigo Lara<sup>1</sup>, Yago Freijanes<sup>2</sup>, Sagrario Muñoz<sup>1</sup>, Gema Ruiz<sup>2</sup>, and V. María Barragán<sup>1,\*</sup>

<sup>1</sup> Department of Structure of Matter, Thermal Physics and Electronics; Faculty of Physics, Complutense University of Madrid, Spain, [inigolar@ucm.es](mailto:inigolar@ucm.es) (I.L.); [smsm@ucm.es](mailto:smsm@ucm.es) (S.M.)

<sup>2</sup> Radiotherapy Service at the General University Hospital Gregorio Marañón, Madrid, [senajiert@gmail.com](mailto:senajiert@gmail.com) (Y.F.); [gruizg@salud.madrid.org](mailto:gruizg@salud.madrid.org) (G.R.)

\*Corresponding [vmabarra@ucm.es](mailto:vmabarra@ucm.es)

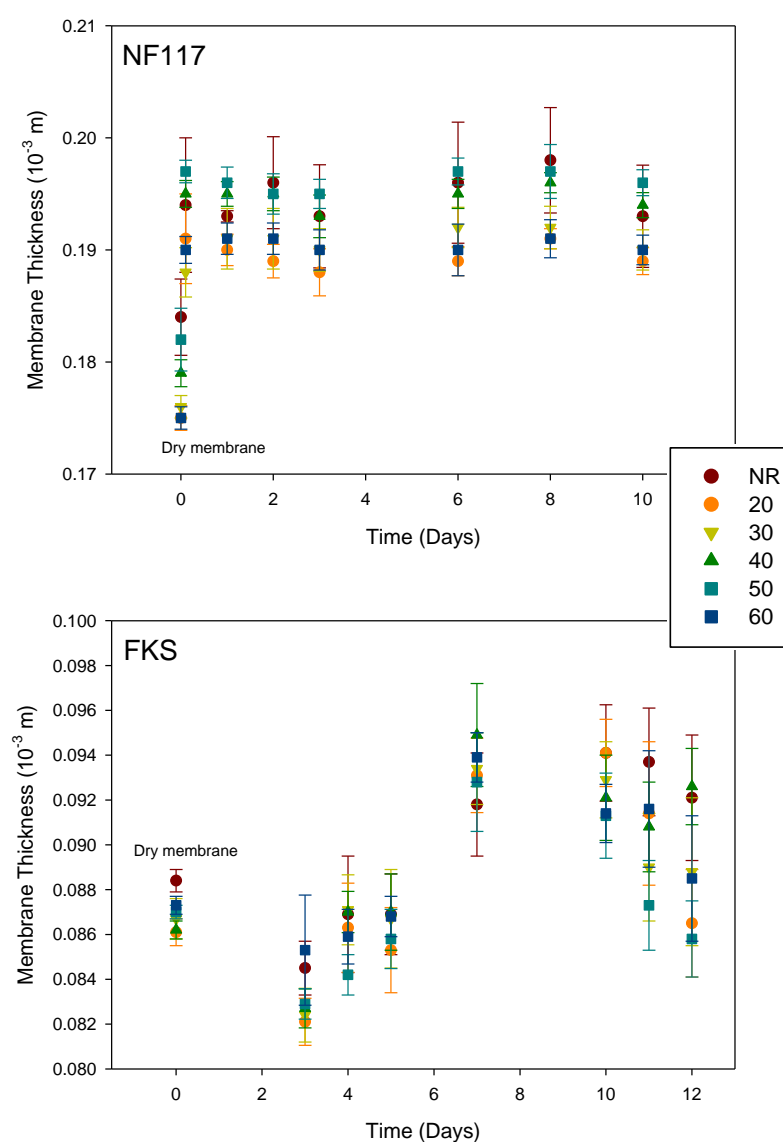

**Figure S1.** Thickness versus time for two of the swollen membranes investigated at all irradiation doses. Non- reinforced NF117 membrane (above). Internally reinforced FKS membrane (bellow).
